# Supplementary material for: Analysis of DNAs associated with coconut foliar decay disease implicates a unique single-stranded DNA virus representing a new taxon
Source: PubMed Central journal article supplement (PMC5890292; doi:10.1038/s41598-018-23739-y), 2018-04-09
Supplement: 41598_2018_23739_MOESM1_ESM.pdf [file 41598_2018_23739_MOESM1_ESM.pdf]

## Supplementary Information

### Analysis of DNAs associated with coconut foliar decay disease implicates a unique single-stranded DNA virus representing a new taxon

Bruno Gronenborn<sup>1</sup>, John W. Randles<sup>2</sup>, Dennis Knierim<sup>3</sup>, Quentin Barrière<sup>1</sup>,  
H. Josef Vetten<sup>4</sup>, Norman Warthmann<sup>5</sup>, David Cornu<sup>1</sup>, Tiata Sileye<sup>6</sup>,  
Stephan Winter<sup>3</sup>, Tatiana Timchenko<sup>1,\*</sup>

<sup>1</sup>Institute for Integrative Biology of the Cell, UMR9198, CNRS, Université Paris-Sud, CEA, Avenue de la  
Terrasse, 91198 Gif sur Yvette, France.

Phone: (+33) 16982 3468

Email: [tania.timchenko@i2bc.paris-saclay.fr](mailto:tania.timchenko@i2bc.paris-saclay.fr)

Email: [bgronenborn@gmail.com](mailto:bgronenborn@gmail.com)

Email: [quentin.barriere@i2bc.paris-saclay.fr](mailto:quentin.barriere@i2bc.paris-saclay.fr)

Email: [David.CORNU@i2bc.paris-saclay.fr](mailto:David.CORNU@i2bc.paris-saclay.fr)

<sup>2</sup>School of Agriculture Food and Wine, University of Adelaide, Glen Osmond, South Australia 5064.

Email: [john.randles@adelaide.edu.au](mailto:john.randles@adelaide.edu.au)

<sup>3</sup>Deutsche Sammlung von Mikroorganismen und Zellkulturen GmbH (DSMZ) Messeweg 11/12,  
38104 Braunschweig

Germany

Email: [dek13@dsmz.de](mailto:dek13@dsmz.de)

[stephan.winter@dsmz.de](mailto:stephan.winter@dsmz.de)

<sup>4</sup>Im Spargelfeld 1

38162 Cremlingen

Germany

Email: [rvetten@gmx.de](mailto:rvetten@gmx.de)

<sup>5</sup>Norman Warthmann

Research School of Biology

The Australian National University

Linnaeus Way, Canberra, ACT 2601, Australia

Email: [norman.warthmann@anu.edu.au](mailto:norman.warthmann@anu.edu.au)

[norman@warthmann.com](mailto:norman@warthmann.com)

<sup>6</sup>Vanuatu Agricultural Research and Technical Centre, Santo, Vanuatu

Email: [tiatas@vanuatu.com.vu](mailto:tiatas@vanuatu.com.vu)

[sileye.tiata@gmail.com](mailto:sileye.tiata@gmail.com)

**\*Corresponding author.**

**Figures S1, S2, S3, S4; Tables S1, S2, S3, S4, S5, S6, S7**



EELEEEPPDRRTIIWVYGPXGEGGKSTFAKHL--IKRDWYFTRGGKTDVLLYQYIGE--PGRNVVFDIPRCK--EDYLNYSLEIEMLNKRXTVSKXKYEPMVXPLINX--VHVIVMANFLPDF-----GKISEDRIKIYYC-----

CFDV-[VU;89]\_alphasat\_R\_Rep LSAIEQPADDRITFWVCGREGGDKSVFAKYLGLKPDWFFYTCGGTRKDVLYQYIIE--PKRNLILVDPVRCN--LDYLNALIECVKNRAFSSDKYEPLSYLGFDDH--VHVIVFANVLPDY-----LKISRDRIKLWNV 290
CFDV-[VU;89]\_alphasat\_1\_Rep LSAIEGEPADDRITLWICGRDGGDKSVFAKYLGLKPDWFFYTCGGTRKDVLYQYIIE--PKRNLILVDPVRCN--LEYNALIECVKNRAFSSDKYEPLSYLGFDDH--VHVIVFANVLPDY-----LKISRDRIKLWNI 290
CFDV-[VU;89]\_alphasat\_2\_Rep LSAIDQPADDRITIIWICGRDGGDKSVFAKYLGLKPDWFFYTCGGTRKDVLYQYIIE--PKRNLILVDPVRCN--VEHLYNALLECVKNRAFSSDKYEPLSYLGFDDH--VHVIVFANVLPDY-----MKISEDRIKFDI 289
CFDV-[VU;89]\_alphasat\_4\_Rep LSEIQEQADDRITLWVCGRTGEGKSVFAKYLGLKPDWFFYTCGGTRKDVLYQYIIE--PKRNLILVDPVRCN--LEHLYNALLECVKNRAFSSDKYEPLSYLGFDDH--VHVIVFANVLPDY-----LKISRDRIKLWDI 290
CFDV-[VU;15]\_alphasat\_8\_Rep LSOIQEQADDRITLWVCGRTGEGKSVFAKYLGLKPDWFFYTCGGTRKDVLYQYIIE--PKRNLILVDPVRCN--LEHLYNALLECVKNRAFSSDKYEPLSYLGFDDH--VHVIVFANVLPDY-----LKISRDRIKLWDI 290
CFDV-[VU;89]\_alphasat\_5\_Rep LAAIEEPPDRRTIIWVYGPXGEGGKSTFAKHL--IKRDWYFTRGGKTDVLLYQYIIE--PKRNLILVDPVRCN--DYMNVAALIECVKNRAFSSDKYEPLSYLGFDDH--VHVIVSNVLPDY-----FKISEDRIKINI 290
CFDV-[VU;89]\_alphasat\_3\_Rep REAISEAPDDRSIIWVYGPXGEGKSTFAKSL--IKQDWFYTRGGKKNILFSYIDEGSEKNIVFDIPRCN--QDYLNDVIEALKDRVIESTKYKPKVIEIEN--IHVVVMANFLPDF-----MKISEDRIKIIRCY 287
CFDV-[VU;89]\_alphasat\_6\_Rep GEAISEAPDDRSIIWVYGPXGEGKSTFAKSL--IKQDWFYTRGGKKNILFSYIDEGSEKNIVFDIPRCN--QDYLNDVIEALKDRVIESTKYKPKVIEIEN--IHVVVMANFLPDF-----MKISEDRIKIIRCY 287
CFDV-[VU;89]\_alphasat\_7\_Rep MEVLQEPADNRITLWICGRDGGDKTEFGKYLGLNEKWFYSCGGKTRDVLVQYIIE--PERNFILVDPVRCN--DQYMNVAALIECVKNRAFSSDKYEPLSYLGFDDH--VHVIVSNVLPDY-----FKISEDRIKINI 290
BBTV\_alphasat\_Y\_Rep\_ACJ36781 TEAIDEEPDDRSIIWVYGPXGEGKSTFAKSL--IKKDWYFTRGGKKNILFSYVDEGSKHIVFDIPRCN--QDYLNDVIEALKDRVIESTKYKPKVIEIEN--IHVVVMANFLPDF-----MKISEDRIKIIRCY 287
BBTV\_alphasat\_HaiKou2\_Rep\_AEF97834 TEAIAEPPDRSIIWVYGPXGEGKSTFAKSL--IKKDWYFTRGGKKNILFSYVDEGSKHIVFDIPRCN--QDYLNDVIEALKDRVIESTKYKPKVIEIEN--IHVVVMANFLPDF-----MKISEDRIKIIRCY 287
BBTV\_alphasat\_S1\_Rep\_AAG44003 TEAIDEEPDDRSIIWVYGPXGEGKSTFAKSL--MKKDWYFTRGGKKNILFSYVDEGSKHIVFDIPRCN--QDYLNDVIEALKDRVIESTKYKPKVIEIEN--IHVVVMANFLPDF-----MKISEDRIKIIRCY 284
CBDV\_alphasat\_Tung1\_Rep\_BAS02103 TEAIAEADDRTIIWVYGPXGEGKSTFAKSL--MKKDWYFTRGGKKNILFSYVDEGSKHIVFDIPRCN--QDYLNDVIEALKDRVIESTKYKPKVIEIEN--VHVIVMANFLPDF-----MKISEDRIKIIRCY 284
CBDV\_alphasat\_Fr\_X7\_Rep\_YP\_008854133 TEAINEEPPDRSIIWVYGPXGEGKSTFAKSL--IKKDWYFTRGGKKNILFSYVDEGSKHIVFDIPRCN--QDYLNDVIEALKDRVIESTKYKPKVIEIEN--VHVIVMANFLPDF-----MKISEDRIKIIRCY 284
BBTV\_alphasat\_4\_Rep\_ACB86656 TELIAEPPDRRTIIWVYGPXGEGKSTFAKSL--IKQDWFYTRGGKKNILFSYVDEGSKHIVFDIPRCN--QDYLNDVIEALKDRVIESTKYKPKVIEIEN--VHVIVMANFLPDF-----MKISEDRIKIIRCY 284
BBTV\_alphasat\_TW3S2\_Rep\_ACJ36782 IQHIEGPDDRSIIWVYGPXGEGKSTFAKSL--IKYGWFFYTAGGKTQDILYMYAQD--PERNIAFVDPVRCN--SEMNYQAMEMKRNRFVFASTKYRVPVLCIRKK--VHLVFNANVADP-----TKLSEDRIVINC 285
MDV\_alphasat\_C2\_Rep\_BAA33981 HRALMEVDDRTIIWVYGPXGEGKSTFAKEL--IKYGWFFYTAGGKTQDILYMYAQD--PERNIAFVDPVRCN--SEMNYQAMEMKRNRFVFASTKYRVPVLCIRKK--VHLVFNANVADP-----TKLSEDRIVINC 285
FBNV\_alphasat\_1\_Rep\_AHC72219 HRVLMPEPDRSIIWVYGPXGEGKSTFAKEL--IKYGWFFYTAGGKTQDILYMYAQD--PERNIAFVDPVRCN--SEMNYQAMEMKRNRFVFASTKYRVPVLCIRKK--VHLVFNANVADP-----TKLSEDRIVINC 285
SCSV\_alphasat\_C2\_Rep\_AAA68018 HAALMAEPDDRSIIWVYGPXGEGKSTFAKEL--IRYGWFFYTAGGKTQDILYMYAQD--PERNIAFVDPVRCN--SEMNYQAMEMKRNRFVFASTKYRVPVLCIRKK--VHLVFNANVADP-----TRISEDRIKIINC 280
FBNSV\_alphasat\_1\_Rep\_AHC72219 HRVLMPEPDRSIIWVYGPXGEGKSTFAKEL--IKYGWFFYTAGGKTQDILYMYAQD--PERNIAFVDPVRCN--SEMNYQAMEMKRNRFVFASTKYRVPVLCIRKK--VHLVFNANVADP-----TRISEDRIKIINC 280
BMLRV\_alphasat\_1\_Rep\_ACB86656 HTALMEPDRSIIWVYGPXGEGKSTFAKEL--IKYGWFFYTAGGKTQDILYMYAQD--PERNIAFVDPVRCN--SEMNYQAMEMKRNRFVFASTKYRVPVLCIRKK--VHLVFNANVADP-----TRISEDRIKIINC 280
FBNV\_alphasat\_C7\_EG93\_Rep\_CAB44025 LKTIIEQEPDDRTIIWVYGPXGEGKSTFAKYLTLKGGWFFYTAGGKTQDILYMYAQD--PTCHVCDIPRCKT--EYINYSVIEALKDRVIESTKYKPKVIEIEN--VHVIVSNVLPDY-----FKISEDRIKINI 283
MDV\_alphasat\_C10\_Rep\_BAA34048 LKTIIEQEPDDRTIIWVYGPXGEGKSTFAKYLTLKGGWFFYTAGGKTQDILYMYAQD--PTCHVCDIPRCKT--EYINYSVIEALKDRVIESTKYKPKVIEIEN--VHVIVSNVLPDY-----FKISEDRIKINI 283
MDV\_alphasat\_C13\_Rep\_BAA33982 IQEIEETPDYRRTIIWVYGPXGEGKSTFAKYLTLKGGWFFYTAGGKTQDILYMYAQD--PTCHVCDIPRCKT--EYINYSVIEALKDRVIESTKYKPKVIEIEN--VHVIVSNVLPDY-----FKISEDRIKINI 283
PNYDV\_alphasat\_3\_Rep\_AHC72280 LEAIQLPPNYRDLVWVYGPXGEGKSTFAKHL--IKYGWFFYTAGGKTQDILYMYAQD--PTCHVCDIPRCKT--EYINYSVIEALKDRVIESTKYKPKVIEIEN--VHVIVSNVLPDY-----FKISEDRIKINI 284
SCSV\_alphasat\_C6\_Rep\_AAA68022 MHLLEEEPPDRSIIWVYGPXGEGKSTFAKHL--IKYGWFFYTAGGKTQDILYMYAQD--PTCHVCDIPRCKT--EYINYSVIEALKDRVIESTKYKPKVIEIEN--VHVIVSNVLPDY-----FKISEDRIKINI 285
BMLRV\_alphasat\_2\_Rep\_AHC72185 EEELEEKIASPRSIWVYGPXGEGKSTFAKEL--ITRGWFFYTRGGKKNILFSYVDEGSKHIVFDIPRCN--QDYLNDVIEALKDRVIESTKYKPKVIEIEN--VHVIVSNVLPDY-----FKISEDRIKINI 281
MDV\_alphasat\_C1\_Rep\_BAA33980 EEELEEKIASPRSIWVYGPXGEGKSTFAKEL--ITRGWFFYTRGGKKNILFSYVDEGSKHIVFDIPRCN--QDYLNDVIEALKDRVIESTKYKPKVIEIEN--VHVIVSNVLPDY-----FKISEDRIKINI 281
FBNSV\_alphasat\_2\_Rep\_AHC72218 EKELEKVPSPRSIIWVYGPXGEGKSTFAKEL--ITRGWFFYTRGGKKNILFSYVDEGSKHIVFDIPRCN--QDYLNDVIEALKDRVIESTKYKPKVIEIEN--VHVIVSNVLPDY-----FKISEDRIKINI 279
PNYDV\_alphasat\_1\_Rep\_AHC72279 EEDLKEASPRSIWVYGPXGEGKSTFAKEL--ITRGWFFYTRGGKKNILFSYVDEGSKHIVFDIPRCN--QDYLNDVIEALKDRVIESTKYKPKVIEIEN--VHVIVSNVLPDY-----FKISEDRIKINI 279
PlCuV-IN\_\_alphasat\_Rep\_AFG29502 KTLLERAPDDRTIIWVYGPXGEGKSTFARDL YRSGTWFFYTRGGKADNVAYQYIGQ--LGNIVFDIPRDK--KDYLYSLEIEMFKDRILVSNKYEPIMAPLINC--IHVVMSNFLPDF-----EKISQDRVHVICPCGVCKQHVGKCEDEYV 315
ClCuV\_alphasat\_Rep\_AIH07616 KTLLERAPDDRTIIWVYGPXGEGKSTFARDL YRSGTWFFYTRGGKADNVAYQYIGQ--LGNIVFDIPRDK--KDYLYSLEIEMFKDRILVSNKYEPIMAPLINC--IHVVMSNFLPDF-----EKISQDRVHVICPCGVCKQHVGKCEDEYV 315
GDS\_alphasat\_Rep\_ALB26259 QTLLERAPDDRTIIWVYGPXGEGKSTFARDL YRSGTWFFYTRGGKADNVAYQYIGQ--LGNIVFDIPRDK--KDYLYSLEIEMFKDRILVSNKYEPIMAPLINC--IHVVMSNFLPDF-----EKISQDRVHVICPCGVCKQHVGKCEDEYV 315
SiLCuV\_alphasat\_Rep\_CBY89002 QTLLERAPDDRTIIWVYGPXGEGKSTFARDL YRSGTWFFYTRGGKADNVAYQYIGQ--LGNIVFDIPRDK--KDYLYSLEIEMFKDRILVSNKYEPIMAPLINC--IHVVMSNFLPDF-----EKISQDRVHVICPCGVCKQHVGKCEDEYV 315
ClCuV\_dalphasat\_Rep\_CAD56270 KTLLERAPDDRTIIWVYGPXGEGKSTFARDL YRSGTWFFYTRGGKADNVAYQYIGQ--LGNIVFDIPRDK--KDYLYSLEIEMFKDRILVSNKYEPIMAPLINC--IHVVMSNFLPDF-----EKISQDRVHVICPCGVCKQHVGKCEDEYV 315
ToLCV\_alphasat\_Rep\_CDH98084 KTLLERAPDDRTIIWVYGPXGEGKSTFARDL YRSGTWFFYTRGGKADNVAYQYIGQ--LGNIVFDIPRDK--KDYLYSLEIEMFKDRILVSNKYEPIMAPLINC--IHVVMSNFLPDF-----EKISQDRVHVICPCGVCKQHVGKCEDEYV 315
TbCSV\_alphasat\_Rep\_CBK44088 KTLLERAPDDRTIIWVYGPXGEGKSTFARDL YRSGTWFFYTRGGKADNVAYQYIGQ--LGNIVFDIPRDK--KDYLYSLEIEMFKDRILVSNKYEPIMAPLINC--IHVVMSNFLPDF-----EKISQDRVHVICPCGVCKQHVGKCEDEYV 315
AEV-IN\_alphasat\_Rep\_CEE15328 KTLLERAPDDRTIIWVYGPXGEGKSTFARDL YRSGTWFFYTRGGKADNVAYQYIGQ--LGNIVFDIPRDK--KDYLYSLEIEMFKDRILVSNKYEPIMAPLINC--IHVVMSNFLPDF-----EKISQDRVHVICPCGVCKQHVGKCEDEYV 315
AYV\_alphasat\_Rep\_CAB59911 KTLLERAPDDRTIIWVYGPXGEGKSTFARDL YRSGTWFFYTRGGKADNVAYQYIGQ--LGNIVFDIPRDK--KDYLYSLEIEMFKDRILVSNKYEPIMAPLINC--IHVVMSNFLPDF-----EKISQDRVHVICPCGVCKQHVGKCEDEYV 315
TbCSV\_alphasat\_Y290\_Rep\_CAI59924 RTLLDRPDDRTIIWVYGPXGEGKSTFARDL YRSGTWFFYTRGGKADNVAYQYIGQ--LGNIVFDIPRDK--KDYLYSLEIEMFKDRILVSNKYEPIMAPLINC--IHVVMSNFLPDF-----EKISQDRVHVICPCGVCKQHVGKCEDEYV 315
AYVIV\_alphasat\_Rep\_CDH98093 KTLLERAPDDRTIIWVYGPXGEGKSTFARDL YRSGTWFFYTRGGKADNVAYQYIGQ--LGNIVFDIPRDK--KDYLYSLEIEMFKDRILVSNKYEPIMAPLINC--IHVVMSNFLPDF-----EKISQDRVHVICPCGVCKQHVGKCEDEYV 315
CYM\_alphasat\_Rep\_CB139303 KTLLERAPDDRTIIWVYGPXGEGKSTFARDL YRSGTWFFYTRGGKADNVAYQYIGQ--LGNIVFDIPRDK--KDYLYSLEIEMFKDRILVSNKYEPIMAPLINC--IHVVMSNFLPDF-----EKISQDRVHVICPCGVCKQHVGKCEDEYV 302
VEM\_alphasat\_2\_Rep\_ALK03648 ERVIRSPASTRDIWVYGPXGEGKSTFAKELLRSG--WFFYTRGGKADNVAYQYIEN--VDRDVFDPIDRCK--KDYLYSLEIEMFKDRILVSNKYEPIMAPLINC--RHVVMSNFLPDF-----SKISQDRVHVICPCGVCKQHVGKCEDEYV 314
Dragonfly\_ass\_alphasat\_Rep\_AFV91336 LELLEVPDRSIIWVYGPXGEGKSTFAKELFRG--WFFYTRGGKADNVAYQYIEN--VDRDVFDPIDRCK--KDYLYSLEIEMFKDRILVSNKYEPIMAPLINC--RHVVMSNFLPDF-----SKISQDRVHVICPCGVCKQHVGKCEDEYV 307
EuYMV\_alphasat\_Rep\_CBA18108 EKVLDEGPDDRTIIWVYGPXGEGKSTFAKEL--IQSGWFFYTRGGKADNVAYQYIEN--LGHCFDLPDPRQ--EDVLYQVTLLEEKDRILVSNKYEPIMAPLINC--VHVIVSNVLPDY-----FKISEDRIKINI 314
CLCuGeV\_alphasat\_Rep\_CDI44972 TSLLELPDDRTIIWVYGPXGEGKSTFAKEL--IQSGWFFYTRGGKADNVAYQYIEN--LGHCFDLPDPRQ--EDVLYQVTLLEEKDRILVSNKYEPIMAPLINC--VHVIVSNVLPDY-----FKISEDRIKINI 295
SCSV-[AU;F]\_M\_Rep\_CAB96405 ERLMET--KDCRRIIWVYGPXGEGKSTFAKHLVKTADFYSTGGKADIAFAWDHQ--ELVLFDFPRSF--EYVNYGVIEIQLKNGI IQSGKYQSVIKYSDY--VEVIFANFTPRS-----GMFSDRIVVYVA 286
FBNV-[EG;1\_93]\_M\_Rep\_NP\_619567 DALLQE--RDGRRIIWVYGPXGEGKSTFAKHLVKTADFYSTGGKADIAFAWDHQ--ELVLFDFPRSF--EYVNYGVIEIQLKNGI IQSGKYQSVIKYSDY--VEVIFANFTPRS-----GMFSDRIVVYVA 286
MDV-[JP;1]\_M\_Rep\_NP\_619769 DTLLEQ--RDGRRIIWVYGPXGEGKSTFAKHLVKTADFYSTGGKADIAFAWDHQ--ELVLFDFPRSF--EYVNYGVIEIQLKNGI IQSGKYQSVIKYSDY--VEVIFANFTPRS-----GMFSDRIVVYVA 286
FBYLV-[ET;231]\_M\_Rep\_CCF74113 DALLME--RDGRRIIWVYGPXGEGKSTFAKHLVKTADFYSTGGKADIAFAWDHQ--ELVLFDFPRSF--EYVNYGVIEIQLKNGI IQSGKYQSVIKYSDY--VEVIFANFTPRS-----GMFSDRIVVYVA 286
FBNSV-[ET;Ho1\_97]\_M\_Rep\_ADJ00306 DALLQE--RDGRRIIWVYGPXGEGKSTFAKHLVKTADFYSTGGKADIAFAWDHQ--ELVLFDFPRSF--EYVNYGVIEIQLKNGI IQSGKYQSVIKYSDY--VEVIFANFTPRS-----GMFSDRIVVYVA 286
PNYDV-[DE;15]\_M\_Rep\_ADE87486 ESLLLE--RDGRRIIWVYGPXGEGKSTFAKHLVKTADFYSTGGKADIAFAWDHQ--ELVLFDFPRSF--EYVNYGVIEIQLKNGI IQSGKYQSVIKYSDY--VEVIFANFTPRS-----GMFSDRIVVYVA 286
PYSV-[AT;15]\_M\_Rep\_AHC72281 ERLMET--KDCRRIIWVYGPXGEGKSTFAKHLVKTADFYSTGGKADIAFAWDHQ--ELVLFDFPRSF--EYVNYGVIEIQLKNGI IQSGKYQSVIKYSDY--VEVIFANFTPRS-----GMFSDRIVVYVA 286
BBTV-[AU]\_M\_Rep\_AAB25544 ENZMAE--PCHRRIIWVYGPXGEGKSTFAKHLVKTADFYSTGGKADIAFAWDHQ--ELVLFDFPRSF--EYVNYGVIEIQLKNGI IQSGKYQSVIKYSDY--VEVIFANFTPRS-----GMFSDRIVVYVA 286
BBTV-[TW]\_M\_Rep\_ABH03036 ENZMAE--PCHRRIIWVYGPXGEGKSTFAKHLVKTADFYSTGGKADIAFAWDHQ--ELVLFDFPRSF--EYVNYGVIEIQLKNGI IQSGKYQSVIKYSDY--VEVIFANFTPRS-----GMFSDRIVVYVA 286
CBDV-[IN]\_M\_Rep\_AGG38934 EELMAQ--PCHRRIIWVYGPXGEGKSTFAKHLVKTADFYSTGGKADIAFAWDHQ--ELVLFDFPRSF--EYVNYGVIEIQLKNGI IQSGKYQSVIKYSDY--VEVIFANFTPRS-----GMFSDRIVVYVA 286
ABTV-[MY]\_M\_Rep\_ABP96965 EELMAE--PCHRRIIWVYGPXGEGKSTFAKHLVKTADFYSTGGKADIAFAWDHQ--ELVLFDFPRSF--EYVNYGVIEIQLKNGI IQSGKYQSVIKYSDY--VEVIFANFTPRS-----GMFSDRIVVYVA 286
ABTV-[PH]\_M\_Rep\_ABP96960 EEI MAE--PCHRRIIWVYGPXGEGKSTFAKHLVKTADFYSTGGKADIAFAWDHQ--ELVLFDFPRSF--EYVNYGVIEIQLKNGI IQSGKYQSVIKYSDY--VEVIFANFTPRS-----GMFSDRIVVYVA 286

B

**Figure S1. Comparison of the master Rep protein sequences of nano- and babuviruses with the Rep protein sequences of selected alphasatellites associated with nanovirids, geminiviruses and CFDV as well as two alphasatellites isolated from insects.**

Alignments were done using ClustalW in MegAlign of DNASTAR. Blue and green boxes A and B indicate the supposed M-Rep signature, i.e. two perfectly conserved sequence signatures characteristic of the M-Rep proteins of nanovirids. Names and accession numbers of the proteins are indicated on the left.

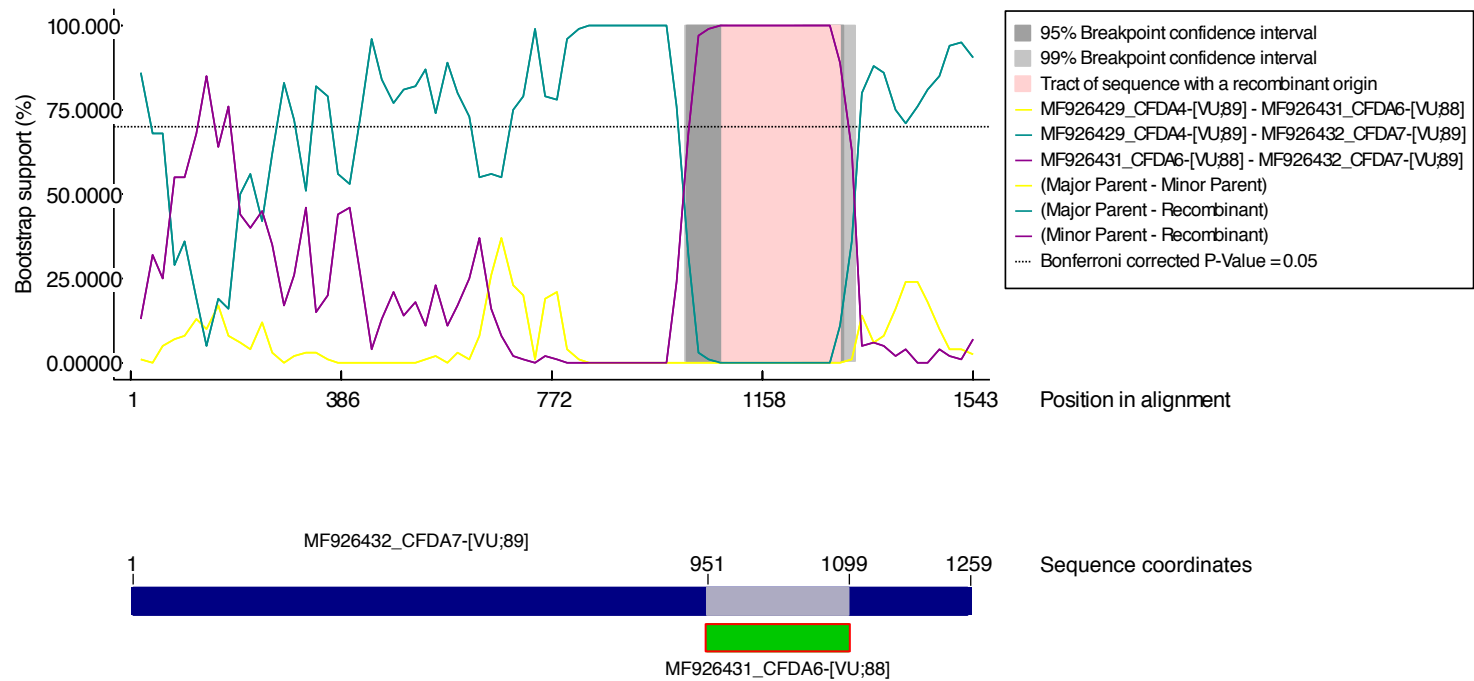

### Figure S2. Recombination analysis

Sequences of CFD alphasatellites were aligned with sequences of ten banana bunchy top and two cardamom bushy dwarf alphasatellites using Muscle (UPGMB clustering, 8 iterations). A recombination analysis by RDP 4<sup>26</sup> identified CFDA7 as a potential recombinant. The recombination event was supported by RDP ( $P$  value  $7.35 \times 10^{-11}$ ), GENECONV ( $P$   $1.3 \times 10^{-10}$ ), BootScan ( $P$   $1.09 \times 10^{-12}$ ), MaxChi ( $P$   $2.77 \times 10^{-9}$ ), Chimaera ( $P$   $3.51 \times 10^{-9}$ ), SiScan ( $P$   $3.0 \times 10^{-11}$ ) and 3Seq ( $P$   $1.54 \times 10^{-5}$ ). Top panel: Bootscan plot as implemented in RDP 4 showing the recombinant region flanked by potential recombination breakpoint regions.

A graphic representation of CFDA7 with the recombinant region (position 951 to 1099) possibly derived from CFDA6 (minor parent) is shown below the plot.

Figure S3

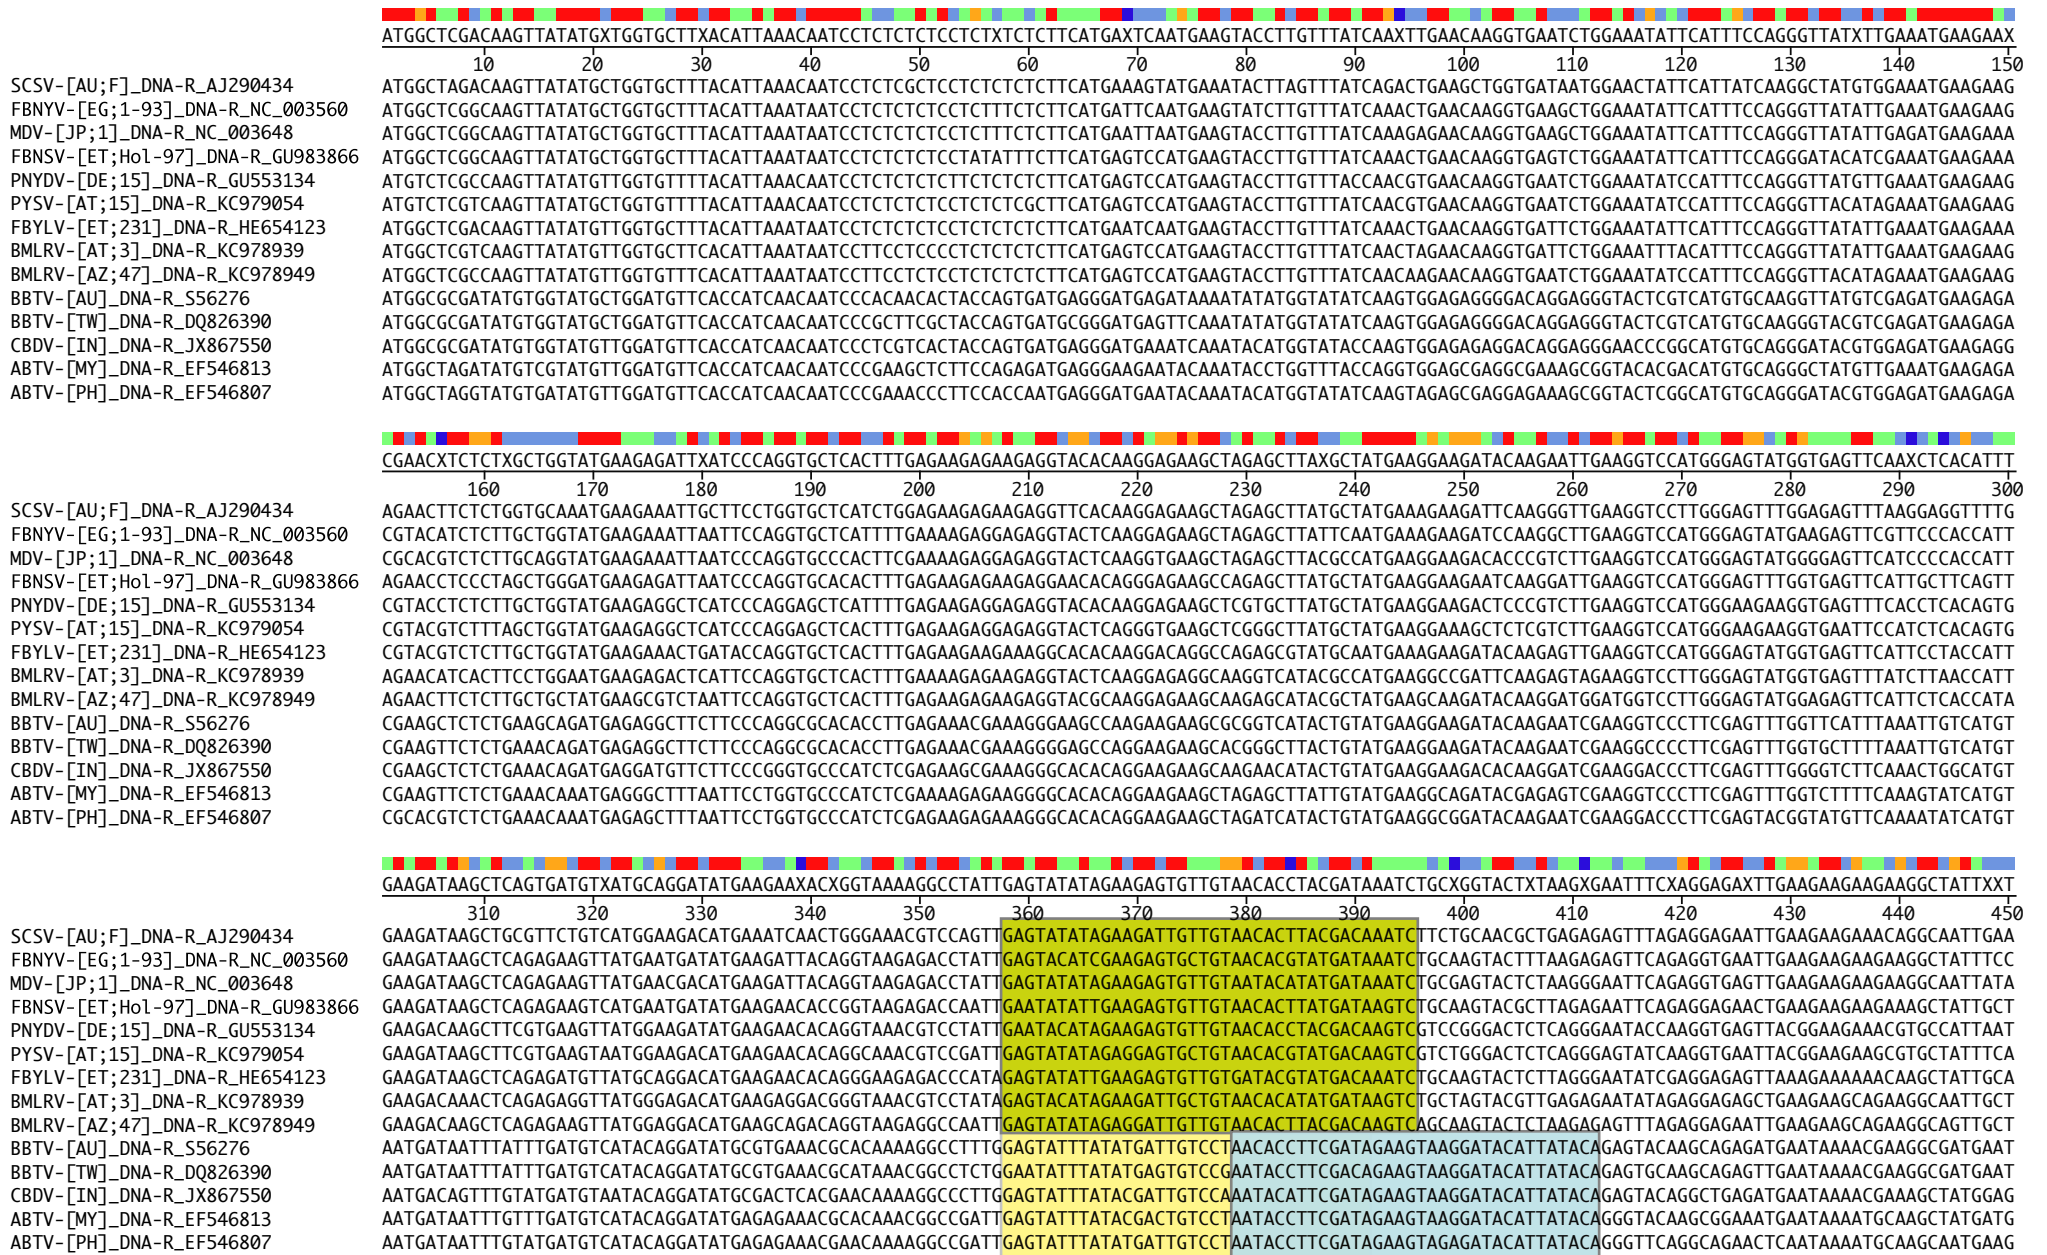

A

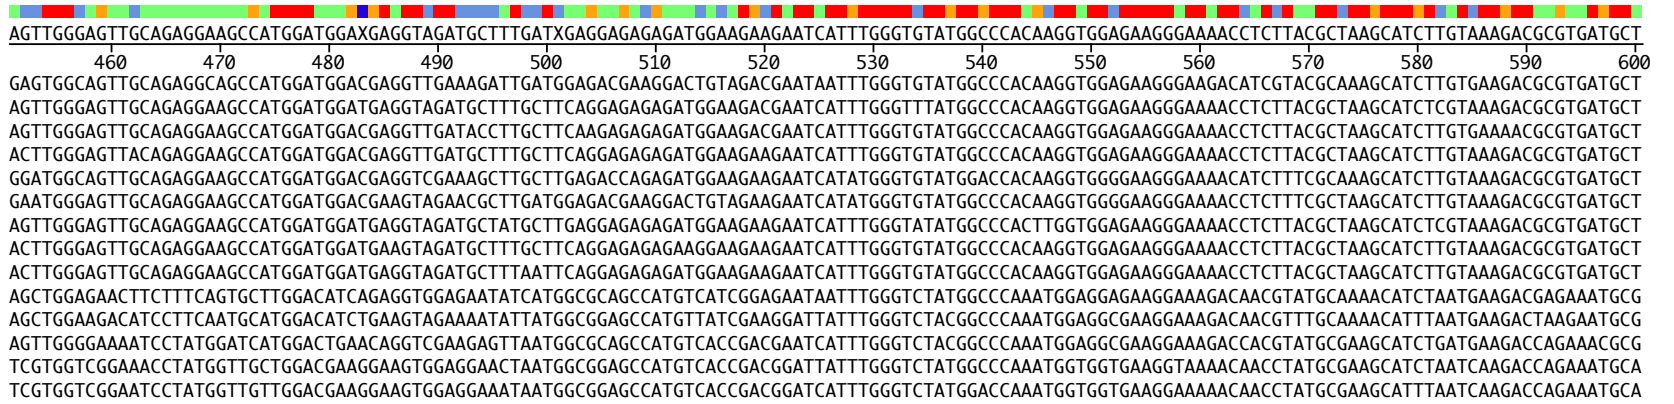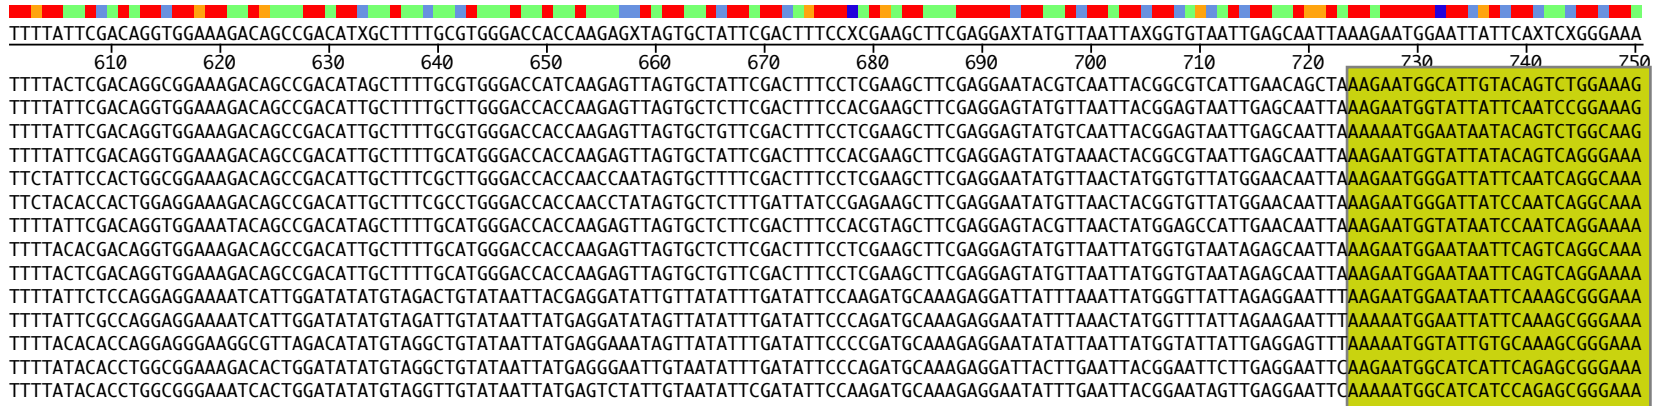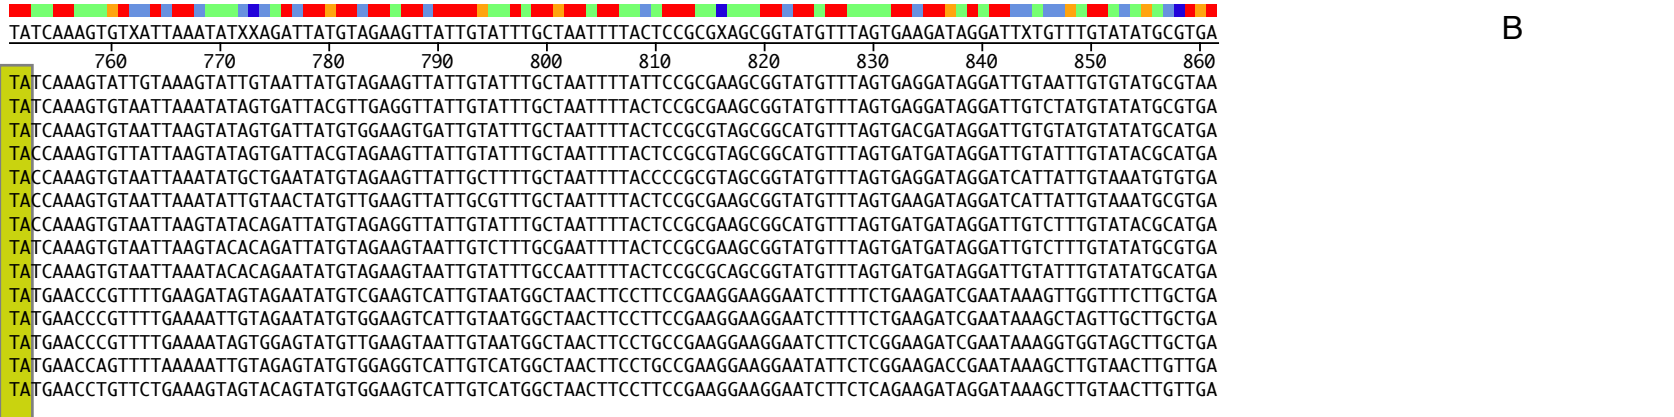

B

**Figure S3. Alignment of coding sequences of nanovirus DNA-R components.**

Alignments were done using ClustalW in MegAlign of DNASTAR. Coloured boxes indicate regions corresponding to the M-Rep amino acid signature regions identified in Fig. S1, boxes A and -B, respectively. These sequences were used to design degenerate oligonucleotide primers (1 to 6, Table S3). Green boxes: fully complementary primers designed for the corresponding region, yellow and blue boxes: overlapping reverse and direct primer, respectively. Names and accession numbers of the respective nano- and babuvirus DNA-R components are indicated on the left



Figure S4

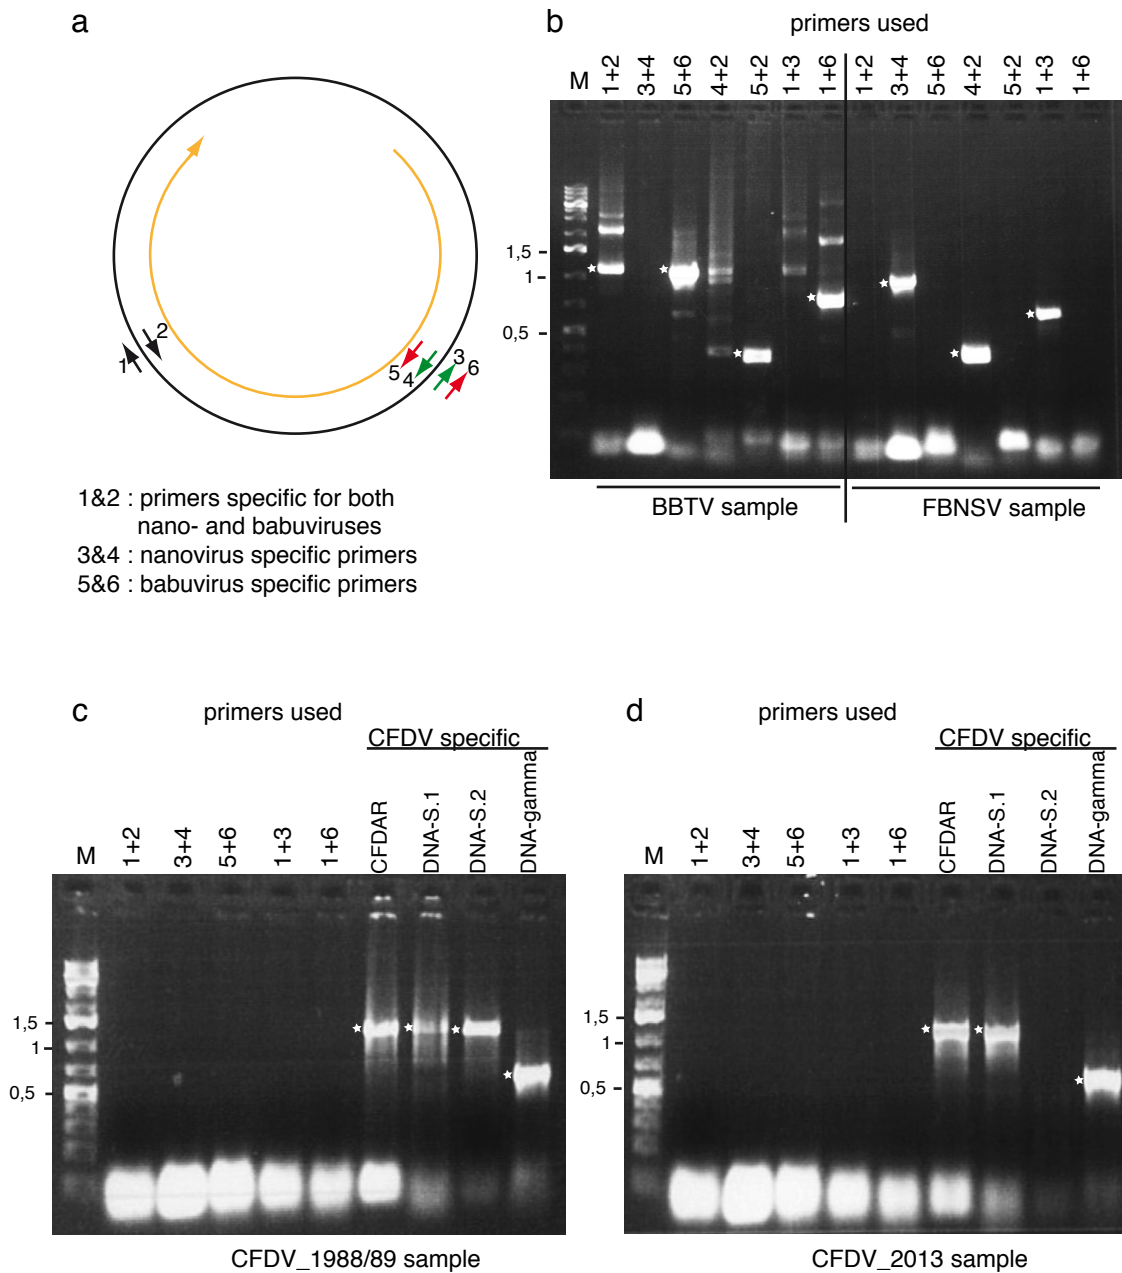

**Figure S4. PCR amplification of nanovirus DNA-R components.**

Degenerate primers (1 to 6, see Table S3) were designed based on the alignments of several babu- and nanovirus DNA-R sequences (see Fig. S3).

a - position and orientation of the primers in relation to nanovirus DNA-R.

b - control amplifications using total DNA extract of BBTV infected banana leaves (Hawaii-2013 sample, this work) or using the plasmid carrying a dimer of FBNSV DNA-R<sup>30</sup>.

c - and d - PCR amplifications using CFDV samples. PCRs were performed on 1:10 diluted RCA products from a mixture of 23 different virion preparations of the CFDV\_88/89 sample pool (c) or from a mixture of total DNA extracts from eleven different leaves of one symptomatic coconut palm for CFDV\_2013 sample (d). CFDV specific primers were designed based on the cloned CFDV DNAs (the primer pairs used amplify a full-length DNA component as indicated, see Table S3).

M- 1 kb plus DNA ladder, the size (K bp) of several bands is indicated on the left of the marker, amplified DNA fragments of expected size are indicated by an asterisk.

**Table S1. CFD samples prepared from symptomatic leaves of coconut palms showing date sampled at VARTC, palm identity, virus preparation date, and characteristics of the buoyant density zone (g/ml) in a Nycodenz® isopycnic density gradient from which the sample was collected**

| Sample No (CFD)         | Sampling date | Palm ID (Number of palms)        | Prep Date | Gradient density | DNA by PAGE | Virions by EM |
|-------------------------|---------------|----------------------------------|-----------|------------------|-------------|---------------|
| 1                       |               | cf2 (1)                          | 28.02.89  | 1.23             | +           | +             |
| 2                       |               | cf2 (1)                          | 28.02.89  | 1.24             | +           | +             |
| <b>3<sup>a,b</sup></b>  | 11.1988       | cf2 + cf3 (2)                    | 06.03.89  | 1.24             | +           | +             |
| 4                       |               | cf2 + cf3 (2)                    | 06.03.89  | 1.24             | +           | +             |
| 5                       |               | cf3 (1)                          | 04.04.89  | 1.24             | +           | n.t.          |
| 6                       |               | cf3 (1)                          | 10.04.89  | 1.24-1.28        | +           | n.t.          |
| <b>7<sup>b</sup></b>    | 11.1988       | cf4 (1)                          | 18.04.89  | 1.23             | +           | n.t.          |
| 8                       | 04.1989       | MRD25-21A (1)                    | 13.06.89  | 1.24-1.29        | +           | n.t.          |
| <b>9<sup>a,b</sup></b>  |               | MRD19 + MRD20 (2)                | 16.10.89  | 1.25             | +           | +             |
| 29                      |               | MRD19 + MRD20 (2)                | 16.10.89  | 1.26             | +           | n.t.          |
| 30                      | 09.1989       | MRD19 + MRD20 (2)                | 16.10.89  | 1.24             | +           | +             |
| 31                      |               | MRD19 + MRD20 (2)                | 16.10.89  | 1.28             | -           | -             |
| 32                      |               | MRD19 + MRD20 (2)                | 16.10.89  | 1.23             | +           | +             |
| 10                      | 09.1989       | MRD37.14 (1)                     | 30.10.89  | 1.27             | +           | n.t.          |
| <b>11<sup>b</sup></b>   |               | MRD37.14 (1)                     | 30.10.89  | 1.26             | +           | n.t.          |
| 21 <sup>c</sup>         |               | MRD caged (unknown)              | 16.08.88  | 1.21-1.29        | +           | n.t.          |
| <b>22<sup>b,c</sup></b> | 07.1988       | MRD caged (unknown)              | 23.08.88  | 1.27-1.29        | +           | n.t.          |
| 23 <sup>c</sup>         |               | MRD caged (unknown)              | 23.08.88  | 1.23             | +           | n.t.          |
| 24                      |               | TT17-7 + 12-86-14 + 12-86-15 (3) | 07.11.88  | 1.27-1.29        | +           | n.t.          |
| 25                      |               | TT17-7 + 12-86-14 + 12-86-15 (3) | 07.11.88  | 1.21-1.23        | +           | n.t.          |
| <b>26<sup>b</sup></b>   | 09.1988       | TT17-7 + 12-86-14 + 12-86-15 (3) | 14.11.88  | 1.23-1.27        | +           | +             |
| 27                      |               | TT17-7 + 12-86-14 + 12-86-15 (3) | 14.11.88  | 1.29             | +           | +             |
| 28                      |               | TT17-7 + 12-86-14 + 12-86-15 (3) | 14.11.88  | 1.23             | +           | +             |

Samples in which DNA or virions were detected by polyacrylamide gel electrophoresis (PAGE) or electron microscopy (EM), respectively, are indicated by (+), or (-) if not detected; n.t. = not tested. MRD, Malayan Red Dwarf; cf2 and other identifiers indicate that variety or hybrid source was not recorded

a - CFD samples from which RCA-DNA was used for cloning;

b - CFD samples from which RCA-DNA was pooled for deep sequencing;

c - CFD samples from caged MRD plants inoculated with viruliferous *Myndus taffini*.

**Table S2. Viral DNAs identified in two CFD samples on the basis of similar RFLP patterns and sequencing**

| Sample | DNA       | Size<br>nt | Enzyme <sup>a</sup> |              |              |             |             |            |
|--------|-----------|------------|---------------------|--------------|--------------|-------------|-------------|------------|
|        |           |            | <i>AatI</i>         | <i>EcoRI</i> | <i>BamHI</i> | <i>KpnI</i> | <i>AgeI</i> | <i>SaI</i> |
| CFD9   | DNA-S.1   | 1286       | 12 <sup>b</sup>     | 7            |              |             |             |            |
|        | DNA-S.2   | 1263       | 3                   | 3            |              |             |             |            |
|        | DNA-gamma | 641        |                     |              |              | 22          |             |            |
|        | CFDAR     | 1271       |                     |              | 6            |             |             |            |
|        | CFDA2     | 1277       |                     |              | 14           |             |             |            |
|        | CFDA3     | 1252       |                     |              | 3            |             |             |            |
|        | CFDA4     | 1276       |                     |              | 2            | 6           |             |            |
|        | CFDA7     | 1259       | 3                   |              |              |             |             |            |
| CFD3   | CFDA1     | 1291       |                     |              |              |             | 3           |            |
|        | CFDA6     | 1264       |                     |              |              |             |             | 3          |

a – DNA fragment obtained upon digestion of RCA DNA by a given enzyme was cloned into Litmus28 (for *AatI* and *AgeI* fragments) or pBluescript KSII (+)

b - number of clones showing similar RFLP pattern: insert DNAs of recombinant plasmids were amplified by PCR using M13 direct and reverse primers, and the PCR products were digested by *HaeIII* or *Sau3A* enzymes.

**Table S3. Oligonucleotides used**

| DNA                             | Primer name (direction) | Sequence (5'-3')                       | T <sub>m</sub> ,<br>C° | Use <sup>a</sup> |
|---------------------------------|-------------------------|----------------------------------------|------------------------|------------------|
| CFDV<br>DNA-S.1                 | CFDV_S1-HindIII-dir     | CCCATTAAGCTTAAAGCCCATTAAGCGATGAC       | 66.9                   | 1                |
|                                 | CFDV_S1-HindIII-rev     | GGCTTTAAGCTTAATGGGCTTCACGCAATTAC       | 68.2                   | 1                |
|                                 | CFDV_S1-590_dir         | CATTGGCGTTTTGTGCTCGATAGAG              | 62.7                   | 2                |
|                                 | CFDV_S1-1160-rev        | CTGCTCATCTATGCCCGCCA                   | 63.7                   | 2                |
| CFDV<br>DNA-S.2                 | CFDV_S2-810-BspEI-dir   | TTCCGGAGATACTGCCG                      | 55.2                   | 1, 2             |
|                                 | CFDV_S2-810-BspEI-rev   | TATCTCCGGAATACTTCA                     | 49.1                   | 1, 2             |
|                                 | CFDV_S2-590-dir         | CATTGGCCTTGGTGTGGACAAAAT               | 61.0                   | 2                |
| CFDV<br>DNA-S.1 &<br>DNA-S.2    | CFDV_S2-1160-rev        | TCTGCTCAAGCTCTGCTCATCC                 | 62.1                   | 2                |
|                                 | CFDV-CP1&2-dir          | CCGGAGGAATAATGTACACGAAGAAG             | 63.2                   |                  |
|                                 | CFDV-CP1&2-dir          | CCTCCGGCATATAAAGCCGGTCTTC              | 66.3                   |                  |
| DNA-S.1<br>related <sup>b</sup> | CFDV_STL1-dir           | CGGCCTAGTATTACCCGCCACGCTC              | 71.1                   | 1                |
|                                 | CFDV_STL1-rev           | ACTAGGCCGCCACGCTTATATACAGAGC           | 69.5                   | 1                |
| DNA-S.2<br>related <sup>c</sup> | CFDV_STL2-dir           | TGCTCCCTACCTCTGCTCATCCTG               | 66.1                   | 1                |
|                                 | CFDV_STL2-rev           | CAGAGCAGAGGTAGTGAGC                    | 58.8                   | 1                |
| CFDV<br>DNA-<br>gamma           | CFDV-gamma-dir          | TGGCGCTGCTCGCCCGCTTCGCTCTGGAGC         | 75                     | 1, 2             |
|                                 | CFDV-gamma-rev          | GCAGCGCCATTAGCTTCTTCCAATTCACCTC        | 69.5                   | 1, 2             |
| CFDAR                           | CFDAR-BamHI-dir         | CATAGAGGATCCGAAAAGAAATTTGATTCTCG       | 64.4                   | 1, 2             |
|                                 | CFDAR-BamHI-rev         | CTTTTCGGATCCTCTATGTACTGATACAGGAC       | 66.9                   | 1, 2             |
| CFDA1                           | CFDA1-dir               | CTTGGCTATAAATGGGTTCTCTCC               | 60.6                   | 2                |
|                                 | CFDA1-rev               | CTTCTCCAGCAAGCTACTCACC                 | 62.1                   | 2                |
| CFDA2                           | CFDA2-392-SstI-dir      | TGCTGAGCTCCGCTTGAAGAACCTGG             | 69.5                   | 3                |
|                                 | CFDA2-696-BamHI-rev     | CTTCGGATCCTCTATGTACTGGTACAGTAC         | 66.8                   | 3                |
|                                 | CFDA2-510-dir           | ATTGGCAACTTGAGTTGCTCAG                 | 58.4                   | 2                |
|                                 | CFDA2-930-rev           | ACAAATGCTAATTGATTATTCAAATATCAA         | 55.8                   | 2                |
| CFDA3                           | CFDA3-398-SstI-dir      | ATTTGAGCTCGTTCCCCGGTTGTAGTTG           | 68.1                   | 2, 3             |
|                                 | CFDA3-789-BamHI-rev     | TTTCGGATCCTTCATCGATATAGGAAAATA         | 61.3                   | 2, 3             |
| CFDA4                           | CFDA4-262-BamHI-dir     | GACAGGATCCACCTCGAACAGGCACAC            | 69.5                   | 2, 3             |
|                                 | CFDA4-563-BamHI-rev     | TCGTCAGCTTGCTTTGGATTTGAGACAGC          | 68.1                   | 2, 3             |
| CFDA5                           | CFDA5-dir               | AGCAGCCGTGCTCGACGA                     | 60.5                   | 1, 2             |
|                                 | CFDA5-rev               | CCGATGAGCAGGGGTATG                     | 58.2                   | 1, 2             |
| CFDA6                           | CFDA6-dir               | GTGGGTCCCACCTTGTTGGACTTTGTGGG          | 69.5                   | 1                |
|                                 | CFDA6-rev               | TGGGACCCACAAGGAGCGTCTGTGCGAC           | 71.0                   | 1                |
|                                 | CFDA6-KpnI-1159-dir     | TGTGGGTACCACTTGTTGGACTTTGTGGGTA        | 68.1                   | 1,3              |
|                                 | CFDA6-KpnI-1172-rev     | AAGTGGTACCCACAAGGAGCGTCTGTGCGA         | 69.5                   | 1, 2,3           |
|                                 | CFDA6-402-SstI-dir      | ATTGGAGCTCGTTCCCCGGTTCTTGTT            | 68.0                   | 2, 3             |
|                                 | CFDA6-789-BamHI-rev     | TTTCGGATCCTTCATCGATATAGGAAAATA         | 61.3                   | 3                |
| CFDA7                           | CFDA7-319-SstI-dir      | CATGGAGCTCCGACGCGTCTGGTT               | 69.5                   | 2, 3             |
|                                 | CFDA7-523-rev           | ACCACAGCTGTAAAACCACTTTTCATTAAG         | 62.7                   | 2, 3             |
| CFDA8                           | CFDA8-210-rev           | TTGTAAGTCCCGCCACCGGAC                  | 65.8                   | 2                |
|                                 | CFDA8-540-dir           | CTTGAATTGTGTCTCAAATCGACGGA             | 63.4                   | 2                |
|                                 | CFDA8-200-dir           | AAGTCCGGTGGCCGGACAGTACAA               | 66.1                   | 1                |
|                                 | CFDA8-200-rev           | CCACCGGACTTCAGATGGAGGAAC               | 66.1                   | 1                |
| nanovirid<br>DNA-R <sup>d</sup> | 1 - b-KNG-dir           | AARATGGnATnaTnCArAGCGGrAARtA           | 61.7                   | 1                |
|                                 | 2 - b-KNG-rev           | TAYTTyCCGCTyTgnATnCCATTyTT             | 61.7                   | 1                |
|                                 | 3 - nanoEYIE-rev        | GAYTTrTCrTAnGTGTTACAACACTCmTCdATrTAYtC | 67.1                   | 1                |
|                                 | 4 - nanoEYIE-dir        | GArTAYATHGAKGAGTGTGTAAACACnTAYGAYAArTC | 67.1                   | 1                |
|                                 | 5 - babu-EYL-dir        | AATACCTTCGAYAGAAGTArAGATACATTATACAG    | 63.6                   | 1                |
|                                 | 6 - babuEYL-rev         | rTCGAAGGTATThGGACArTCrTATAAATACTC      | 64.3                   | 1                |

a – a pair of primers indicated by the same number was used for PCR amplification of the corresponding DNA for the following purposes: (1) full-length cloning, (2) component-specific detection by PCR, (3) amplification of the fragment for construction of redundant copies of the component;

b – primers designed based on the DNA sequence in the region with potential stem-loop structure (STL) of CFDV DNA-S.1;

c – primers designed on the basis of the DNA sequence of STL region of CFDV DNA-S.2;

d – primers designed on the basis of the alignment of the nanovirid DNA-R sequences.

**Table S4. Mapping of primary reads from deep sequencing data of three BBTV samples**

| Sample             | BBTV-Hawaii_2013<br>(26,758,442 total reads) |            |           | BBTV-Nigeria_2013<br>(25,761,084 total reads) |            |           | BBTV-Vietnam_2013<br>(34,536,988 total reads) |            |           |
|--------------------|----------------------------------------------|------------|-----------|-----------------------------------------------|------------|-----------|-----------------------------------------------|------------|-----------|
|                    | Reads                                        | % of reads | Cov. Mean | Reads                                         | % of reads | Cov. Mean | Reads                                         | % of reads | Cov. Mean |
| DNA-R              | 1,671,973                                    | 6.3        | 149,484   | 562,089                                       | 2.2        | 50,015    | 731,405                                       | 2.1        | 65,039    |
| DNA-S              | 571,790                                      | 2.1        | 50,314    | 67,470                                        | 0.3        | 5,952     | 3,042,114                                     | 8.8        | 271,294   |
| DNA-M              | 1,306,112                                    | 4.9        | 122,536   | 264,262                                       | 1          | 24,898    | 1,302,658                                     | 3.8        | 124,545   |
| DNA-N              | 7,240,846                                    | 27.1       | 657,758   | 6,323,995                                     | 24.6       | 565,927   | 5,100,799                                     | 14.8       | 460,561   |
| DNA-C              | 5,137,818                                    | 19.2       | 502,970   | 893,580                                       | 3.5        | 87,631    | 850,602                                       | 2.5        | 82,171    |
| DNA-U3             | 8,579,130                                    | 32.1       | 797,873   | 5,282,003                                     | 20.5       | 487,589   | 3,922,111                                     | 11.4       | 363,683   |
| BBTA2 <sup>a</sup> |                                              |            |           |                                               |            |           | 3,161,344                                     | 9.2        | 279,229   |
| total              | 24,507,669                                   | 91.6       |           | 13,393,399                                    | 52         |           | 18,111,033                                    | 52.4       |           |

Geneious mapping of total reads against all identified (*de novo* assembled) BBTV DNAs, performed with the settings allowing 10% mismatch per read. Cov. Mean – average coverage.  
a - a variant of the proposed alphasatellite species BBTA2<sup>25</sup>

**Table S5. CFDV mutant spectra**

| DNA     | Year | Total | Type of base changes |        |        |        |        |        |        |        |        |        |        |        |   | transitions | transversions | deletions | insertions |
|---------|------|-------|----------------------|--------|--------|--------|--------|--------|--------|--------|--------|--------|--------|--------|---|-------------|---------------|-----------|------------|
|         |      |       | A<br>C               | A<br>G | A<br>T | C<br>A | C<br>G | C<br>T | G<br>A | G<br>C | G<br>T | T<br>A | T<br>C | T<br>G |   |             |               |           |            |
| DNA-R   | 1989 |       |                      |        |        |        |        |        |        |        |        |        |        |        | 0 | 0           |               |           |            |
|         | 2013 | 2     |                      |        |        |        |        |        | 1      |        |        |        |        |        | 0 | 1           |               | 1 (+1)    |            |
| DNA-S.1 | 1989 |       |                      |        |        |        |        |        |        |        |        |        |        |        |   |             |               |           |            |
|         | 2013 | 1     |                      |        |        |        |        |        |        |        |        |        | 1      |        |   |             |               |           |            |
|         | 2015 | 0     |                      |        |        |        |        |        |        |        |        |        |        |        | 0 | 0           |               |           |            |
| DNA-S.2 | 1989 |       |                      |        |        |        |        | 1      |        |        |        |        | 1      | 1      | 2 | 1           |               |           |            |
|         | 2015 | 3     |                      |        |        |        |        |        |        |        |        |        |        |        | 0 | 0           |               |           |            |
| CFDA1   | 1985 |       |                      |        |        |        |        |        |        |        |        |        |        |        | 0 | 0           |               |           |            |
|         | 1988 | 2     |                      |        |        |        |        | 1      | 1      |        |        |        |        |        | 2 | 0           |               |           |            |
|         | 1989 | 1     |                      |        |        |        |        |        |        |        |        |        | 1      |        | 1 | 0           |               |           |            |
|         | 2013 | 20    | 1                    | 1      |        |        | 2      | 3      | 3      | 2      | 3      |        | 1      | 2      | 7 | 11          | 1 (-3)        | 1 (+1)    |            |

Number and type of changes between the most recent and respective previous sampling dates are shown. For calculation of the nucleotide substitution rates per site per year the deletion of three nucleotides is counted as one event.

**Table S6. Cloning of redundant copies of CFD associated DNAs used for replication assays**

| DNA            | Primers used for PCR amplification of monomer <sup>a</sup> | Monomer <sup>b</sup>            | Primers used for PCR amplification of 0,2 mer <sup>c</sup> | Redundant copy in pBin19                                                                                                                                                                                                                                                                                                               |
|----------------|------------------------------------------------------------|---------------------------------|------------------------------------------------------------|----------------------------------------------------------------------------------------------------------------------------------------------------------------------------------------------------------------------------------------------------------------------------------------------------------------------------------------|
| CFDV DNA-S.1   | CFDV_S1-HindIII-dir<br>CFDV_S1-HindIII-rev                 | pBluescriptIIKS(+)-HindIII-S1-5 |                                                            | Dimer first obtained by cloning a monomer into pBluescriptIIKS(+) HindIII site and then transferred into pBin19 as BamHI-KpnI fragment                                                                                                                                                                                                 |
| CFDV DNA-S.2   | CFDV_S2-810-BspEI-dir<br>CFDV_S2-810-BspEI-rev             | pBluescriptIIKS(+)-BspEI-S2-4   |                                                            | Dimer first obtained by cloning a monomer into pBluescriptIIKS(+) BspEI site and then transferred into pBin19 as BamHI-KpnI fragment                                                                                                                                                                                                   |
| CFDV DNA-gamma |                                                            | pBluescriptIIKS(+)-KpnI-mini-6  |                                                            | Direct cloning of a monomer into KpnI site of pBin19 with selection of dimer insertion                                                                                                                                                                                                                                                 |
| CFDAR          | CFDAR-BamHI-dir<br>CFDAR-BamHI-rev                         | pBluescriptIIKS(+)-BamHI-AR-1   |                                                            | Direct cloning of a monomer into BamHI site of pBin19 with selection of dimer insertion                                                                                                                                                                                                                                                |
| CFDA1          |                                                            | Litmus28-AgeI-A1-6 <sup>d</sup> |                                                            | Dimer first obtained by cloning a monomer into Litmus28 AgeI site and then transferred into pBin19 as BamHI-KpnI fragment                                                                                                                                                                                                              |
| CFDA2          |                                                            | pBluescriptIIKS(+)-BamHI-A2-2   | CFDA2-392-SstI-dir<br>CFDA2-696-BamHI-rev                  | 302 bp fragment was PCR amplified using indicated primers, digested by SstI and inserted into pBin19-(SstI-HindIIIblunt) <sup>e</sup> plasmid. CFDA2 monomer was consequently inserted into BamHI site of this plasmid thus giving rise to CFDA2 1,2 mer.                                                                              |
| CFDA3          |                                                            | pBluescriptIIKS(+)-BamHI-A3-24  | CFDA3-398-SstI-dir<br>CFDA3-789-BamHI-rev                  | 390 bp fragment was PCR amplified using indicated primers, digested by SstI and inserted into pBin19-(SstI-HindIIIblunt) plasmid. CFDA3 monomer was subsequently inserted into BamHI site of this plasmid thus giving rise to CFDA3 1,2 mer.                                                                                           |
| CFDA4          |                                                            | pBluescriptIIKS(+)-BamHI-A4-14  | CFDA4-262-BamHI-dir<br>CFDA4-563-BamHI-rev                 | 300 bp fragment was PCR amplified using indicated primers, digested by BamHI and inserted into pBin19-(BamHI-HindIIIblunt) <sup>f</sup> plasmid. CFDA4 monomer was consequently inserted into BamHI site of this plasmid thus giving rise to CFDA2 1,2 mer.                                                                            |
| CFDA6          | CFDA6-KpnI-1159-dir<br>CFDA6-KpnI-1172-rev                 | pBluescriptIIKS(+)-HincII-A6-7  | CFDA6-402-SstI-dir<br>CFDA6-789-BamHI-rev                  | 360 bp fragment was PCR amplified using indicated primers, digested by SstI and inserted into pBin19-(SstI-HindIIIblunt) plasmid. CFDA6 monomer, liberated as KpnI fragment, was ligated, ligation product digested by BamHI and inserted into BamHII site of the plasmid with cloned 360 fragment, thus giving rise to CFDA6 1,2 mer. |

|       |                      |                                     |                                                                                                                                                                                                                                                                                                                                          |
|-------|----------------------|-------------------------------------|------------------------------------------------------------------------------------------------------------------------------------------------------------------------------------------------------------------------------------------------------------------------------------------------------------------------------------------|
| CFDA7 | Litmus28-AatII-A7-15 | CFDA7-319-SstI-dir<br>CFDA7-523-rev | 320 bp fragment was PCR amplified using indicated primers, digested by SstI and inserted into pBin19-(SstI-HindIIIblunt) plasmid. CFDA7 monomer, liberated as AatI fragment, was ligated, ligation product digested by HindIII and inserted into HindIII site of the plasmid with cloned 320 fragment, thus giving rise to CFDA7 1,2 mer |
|-------|----------------------|-------------------------------------|------------------------------------------------------------------------------------------------------------------------------------------------------------------------------------------------------------------------------------------------------------------------------------------------------------------------------------------|

- a - PCR performed on RCA DNA of sample CFD\_88/89
- b - plasmids used to clone a given DNA in the restriction site indicated, numbers at the end identify the recombinant plasmids
- c - viral DNA from the plasmid shown under "Monomer" was used for PCR amplification
- d - if primers are not indicated in the second column, viral DNA was cloned as monomer after restriction of RCA DNA into the corresponding plasmid, see Table S2 for enzymes used.
- e - pBluescriptIIS(+ ) plasmid was digested by *HindIII*, the ssDNA ends resulting after digestion were filled using dNTPs and Klenow polymerase. After purification by phenol extraction and ethanol precipitation the plasmid DNA was digested by *SstI*.
- f - pBluescriptIIS(+ ) plasmid was digested by *HindIII*, the ssDNA ends resulting after digestion were filled using dNTPs and Klenow polymerase. After purification by phenol extraction and ethanol precipitation the plasmid DNA was digested by *BamHI*.



**Table S7. GenBank accession numbers of CFD associated DNAs**

| Year \ DNA | 1985   | 1988     | 1989     | 2013     | 2015     |
|------------|--------|----------|----------|----------|----------|
| DNA-S.1    |        |          | MF926436 | MF926437 | MF926438 |
| DNA-S.2    |        |          | MF926439 |          | MF926440 |
| DNA-gamma  |        |          | MF926441 | MF926442 | MF926443 |
| CFDAR      |        |          | MF926434 | MF926435 |          |
| CFDA1      | M29963 | MF926423 | MF926424 | MF926425 |          |
| CFDA2      |        |          | MF926426 |          |          |
| CFDA3      |        |          | MF926427 |          |          |
| CFDA4      |        |          | MF926429 | MF926444 |          |
| CFDA5      |        |          | MF926430 |          |          |
| CFDA6      |        | MF926431 |          |          |          |
| CFDA7      |        |          | MF926432 |          |          |
| CFDA8      |        |          |          |          | MF926433 |
